# Supplementary material for: Duration of extraction determines CO 2 and CH 4 emissions from an actively extracted peatland in eastern Quebec, Canada
Source: Copernicus journal article supplement (doi:10.5194/bg-20-737-2023), 2023-02-15
Supplement: Supplementary file 1 [file bg-20-737-2023-supplement.pdf]

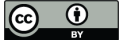

*Supplement of*

## **Duration of extraction determines CO<sub>2</sub> and CH<sub>4</sub> emissions from an actively extracted peatland in eastern Quebec, Canada**

**Laura Clark et al.**

*Correspondence to:* Ian B. Strachan ([ian.strachan@queensu.ca](mailto:ian.strachan@queensu.ca))

The copyright of individual parts of the supplement might differ from the article licence.

Table S1. Physical and chemical properties of the studied peatland. Density and porosity are from Lai (2022); all other properties are from Kendall (2020).

| Depth<br>(m) | Density<br>(kg m <sup>-3</sup> ) | Porosity<br>-- | C<br>(mg g <sup>-1</sup> ) | N<br>(mg g <sup>-1</sup> ) | C:N<br>-- | P<br>(µg g <sup>-1</sup> ) | Lignin<br>(mg g <sup>-1</sup> ) | Holocellulose<br>(mg g <sup>-1</sup> ) |
|--------------|----------------------------------|----------------|----------------------------|----------------------------|-----------|----------------------------|---------------------------------|----------------------------------------|
| 0-0.4        | 110-140                          | 0.82-0.87      | 519 ±28                    | 12.6 ±1.6                  | 43 ±5     | 219 ±9                     | 358 ±18                         | 528 ±14                                |
| > 0.4        | 70-80                            | 0.92-0.94      | 499 ±20                    | 10.5 ±2.1                  | 49 ±10    | 189 ±12                    | 459 ±75                         | 600 ±66                                |

Kendall, R. A.: Microbial and substrate decomposition factors in Canadian commercially extracted peatlands, M.Sc. Thesis, Department of Geography, McGill University, 102 pp., 2020.

Lai, O. Y.: Peat moisture and thermal regimes for peatlands undergoing active extraction, M.Sc. Thesis, Department of Geography, McGill University, 65 pp., 2022.

Table S2. CO<sub>2</sub> (g C m<sup>-2</sup> d<sup>-1</sup>), CH<sub>4</sub> (mg C m<sup>-2</sup> d<sup>-1</sup>) fluxes and measurements of soil temperature (T<sub>soil</sub> °C; average of 0.02, 0.05, 0.10, 0.15, 0.20 m) and volumetric soil moisture (% VSM at 0.10 m) by sector for fields (2 m, 5 m, 15 m transect positions combined) and ditches.

|       |                   |           | 1987  | 2007  | 2010 | 2013 | 2016  | All sectors |
|-------|-------------------|-----------|-------|-------|------|------|-------|-------------|
| Field | CO <sub>2</sub>   | Mean      | 0.6   | 0.7   | 0.6  | 0.7  | 1.5   | 0.9         |
|       |                   | Std. Dev. | 0.7   | 0.5   | 0.4  | 0.4  | 2.7   | 1.6         |
|       | CH <sub>4</sub>   | Mean      | 2.4   | 5.0   | 11.7 | 2.0  | 21.9  | 9.2         |
|       |                   | Std. Dev. | 26.9  | 22.6  | 61.3 | 13.6 | 195.9 | 103.0       |
|       | T <sub>soil</sub> | Mean      | 18.0  | 18.4  | 20.0 | 16.9 | 19.6  | 18.7        |
|       |                   | Std. Dev. | 5.1   | 4.4   | 4.6  | 3.2  | 5.0   | 4.7         |
| VSM   | Mean              | 31.0      | 35.1  | 31.7  | 31.6 | 33.7 | 32.8  |             |
|       | Std. Dev.         | 8.1       | 6.9   | 7.6   | 6.3  | 7.9  | 7.6   |             |
| Ditch | CO <sub>2</sub>   | Mean      | 1.4   | 2.6   | 1.8  | 1.7  | 2.0   | 2.0         |
|       |                   | Std. Dev. | 1.2   | 2.6   | 1.5  | 1.1  | 2.5   | 2.2         |
|       | CH <sub>4</sub>   | Mean      | 32.9  | 113.6 | 46.7 | 14.3 | 128.4 | 84.2        |
|       |                   | Std. Dev. | 155.0 | 421.0 | 58.4 | 54.7 | 398.6 | 325.4       |
|       | T <sub>soil</sub> | Mean      | 19.5  | 18.9  | 20.7 | 17.6 | 20.8  | 19.6        |
|       |                   | Std. Dev. | 4.1   | 4.3   | 5.3  | 2.9  | 4.9   | 4.5         |
|       | VSM               | Mean      | 35.8  | 28.1  | 29.6 | 32.2 | 36.4  | 32.4        |
|       |                   | Std. Dev. | 28.8  | 27.6  | 35.1 | 37.7 | 28.1  | 30.4        |
